# Supplementary material for: Rational design of a 2D TiO2–MoO3 step-scheme heterostructure for boosted photocatalytic overall water splitting
Source: Royal Society of Chemistry journal article supplement (doi:10.1039/d2nj00173j), 2022-01-01
Supplement: d2nj00173j1.pdf [file d2nj00173j1.pdf]

## Electronic Supporting Information

### Rational design of 2D TiO<sub>2</sub>-MoO<sub>3</sub> Step-scheme heterostructure for boosted photocatalytic overall water splitting

Gubran Alnaggar <sup>a</sup>, Khaled Alkanad <sup>b</sup>, Sujay Shekar G. Chandrashekar <sup>b</sup>, Mohammed Abdullah Bajiri <sup>c</sup>, Qasem A. Drmosh <sup>d</sup>, Lokanath N. Krishnappagowda <sup>b</sup>, Sannaiah Ananda <sup>a,\*</sup>

<sup>a</sup> Department of studies in Chemistry, University of Mysore, Manasagangothiri, Mysuru, 570006, India

<sup>b</sup> Department of studies in Physics, University of Mysore, Manasagangothiri, Mysuru, 570006, India.

<sup>c</sup> Department of Studies and Research in Industrial Chemistry, School of Chemical Sciences, Kuvempu University, Shankaraghatta-577 451, India

<sup>d</sup> Interdisciplinary Research Center for Hydrogen and Energy Storage (IRC-HES), King Fahd University of Petroleum & Minerals (KFUPM), Dhahran 31261, Saudi Arabia.

\* Corresponding author,

Email address: [snananda@yahoo.com](mailto:snananda@yahoo.com) (S.Ananda)

## CONTENTS

**Fig.S1.** Diagram representing the electrochemical synthesis process of TO-MO-30 heterostructure

**Table.S1.** The reported details of TiO<sub>2</sub>/MoO<sub>3</sub>

**Fig.S2.** SEM images of TO-MO-40 (a) and TO-MO-5 (b) heterostructure photocatalysts

**Fig.S3.** Selected area electron diffraction SAED image of TO-MO-30

**Fig.S4.** BJH Pore size distribution of pristine (a) MoO<sub>3</sub>, (b) TiO<sub>2</sub> photocatalyst, and (c) TO-MO-5, (d) TO-MO-30, and (e) TO-MO-40 heterostructure photocatalysts

**Fig.S5.** EDX spectra of (a) TO-MO-5, (b) TO-MO-30, and (c) TO-MO-40 heterostructure photocatalyst

**Fig.S6.** SEM image of TO-MO-30 heterostructure photocatalyst after five cycles

**Table S2.** Photocatalytic water splitting comparison with existing MoO<sub>3</sub> based materials

**Table S1.**The reported details of TiO<sub>2</sub>/MoO<sub>3</sub>

| Synthesis methods             | Morphology                   | Application                  | Mechanism          | Ref.             |
|-------------------------------|------------------------------|------------------------------|--------------------|------------------|
| <b>Electrochemical method</b> | <b>Sheets-like</b>           | <b>Water splitting</b>       | <b>Step-scheme</b> | <b>This work</b> |
| Laser ablation                | Spherical                    | Degradation (Methylene Blue) |                    | 1                |
| impregnation method           | NA                           | Degradation (Methylene Blue) |                    | 2                |
| Ti-Mo alloy anodization       | Nanotube layers              | Water splitting              | NA                 | 3                |
| incipient wetness method      | Film                         | Gas 2-propanol               |                    | 4                |
| In-situ growth method         | Nanobelts                    | Degradation Rhodamine B      | heterojunction     | 5                |
| sol-gel method                | NA                           | Degradation Rhodamine B      |                    | 6                |
| hydrothermal treatment        | sphere-like                  | Degradation benzyl alcohol   | heterojunction     | 7                |
| Langmuir blotting technique   | Film                         | Degradation Stearic acid     |                    | 8                |
| Hydrothermal methods          | Nanofiber                    | Degradation Rhodamine B      |                    | 9                |
| a modified sol-gel method     | Mesoporous nanocrystals      | Degradation Methylene Blue   |                    | 10               |
| sol-gel method                | Rod decorated by sphere like | Degradation Molasses         | Z-scheme           | 11               |
| Hydrothermal method           | Nanowire array               | Lithium battery              | NA                 | 12               |
| Hydrothermal and calcination  | Nanofiber                    | Degradation Rhodamine B      | Heterojunction     | 13               |
| Sol-gel method                | NA                           | Degradation Rhodamine B      | Heterojunction     | 14               |
| Impregnation method           | NA                           | H <sub>2</sub> production    | Z-scheme           | 15               |
| Hydrothermal                  | 2D/1D                        | CO <sub>2</sub> reduction    | Plasmonic effect   | 16               |

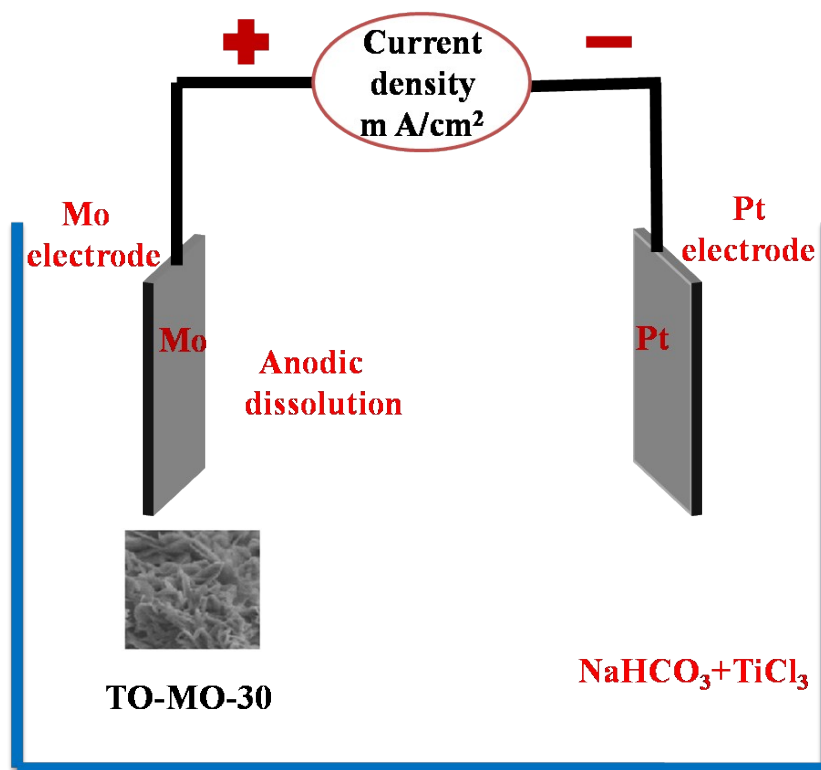

Fig.S1. Diagram representing the electrochemical synthesis process of TO-MO-30 heterostructure

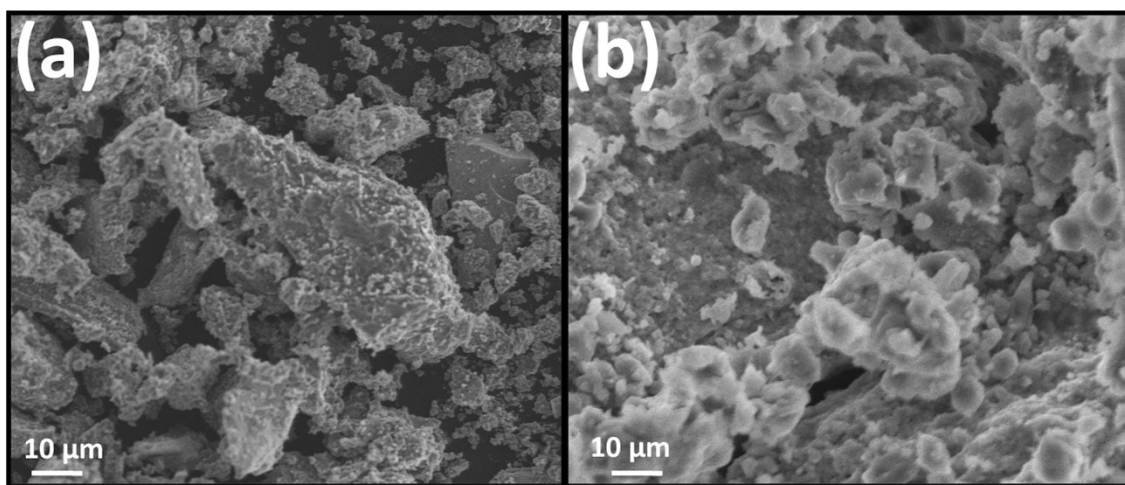

Fig.S2. SEM images of TO-MO-5 (a) and TO-MO-40 (b) heterostructure photocatalysts

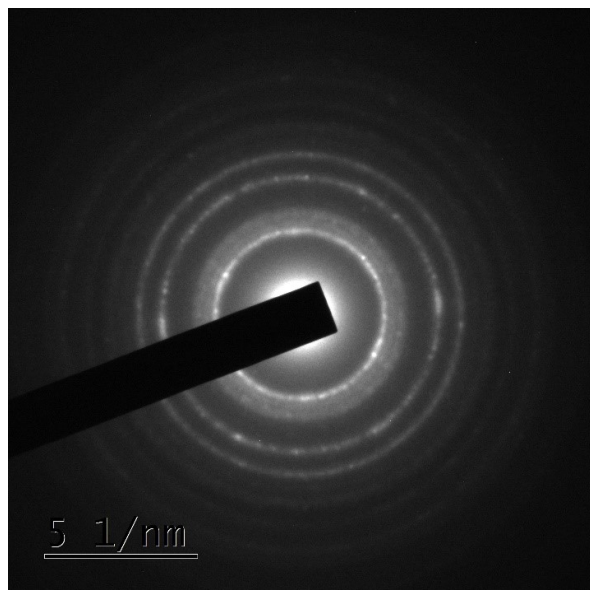

**Fig.S3.** Selected area electron diffraction SAED image of TO-MO-30

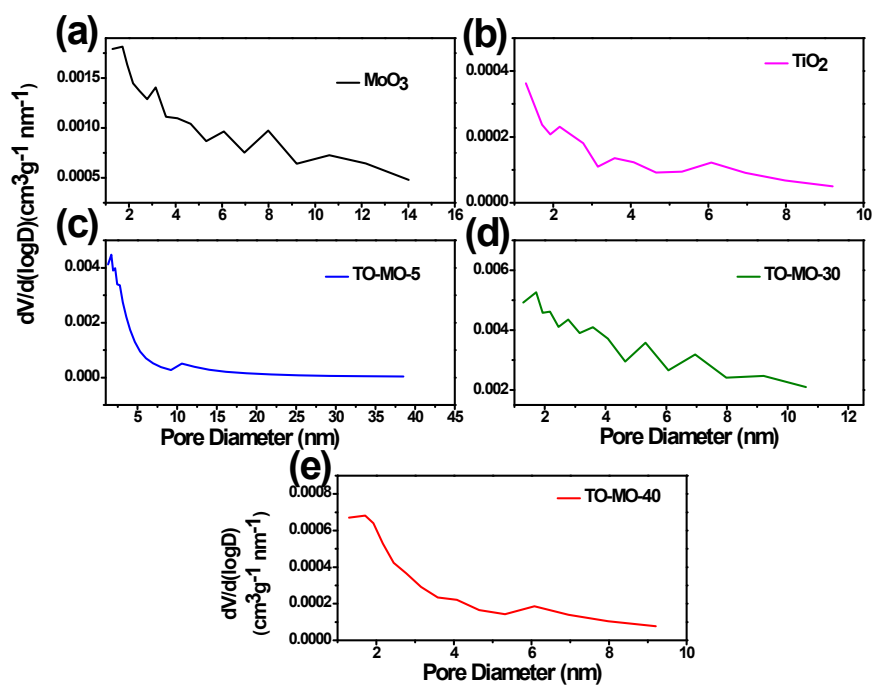

**Fig.S4** BJH Pore size distribution of pristine (a) MoO<sub>3</sub>, (b) TiO<sub>2</sub> photocatalyst, and (c) TO-MO-5, (d) TO-MO-30, and (e) TO-MO-40 heterostructure photocatalysts

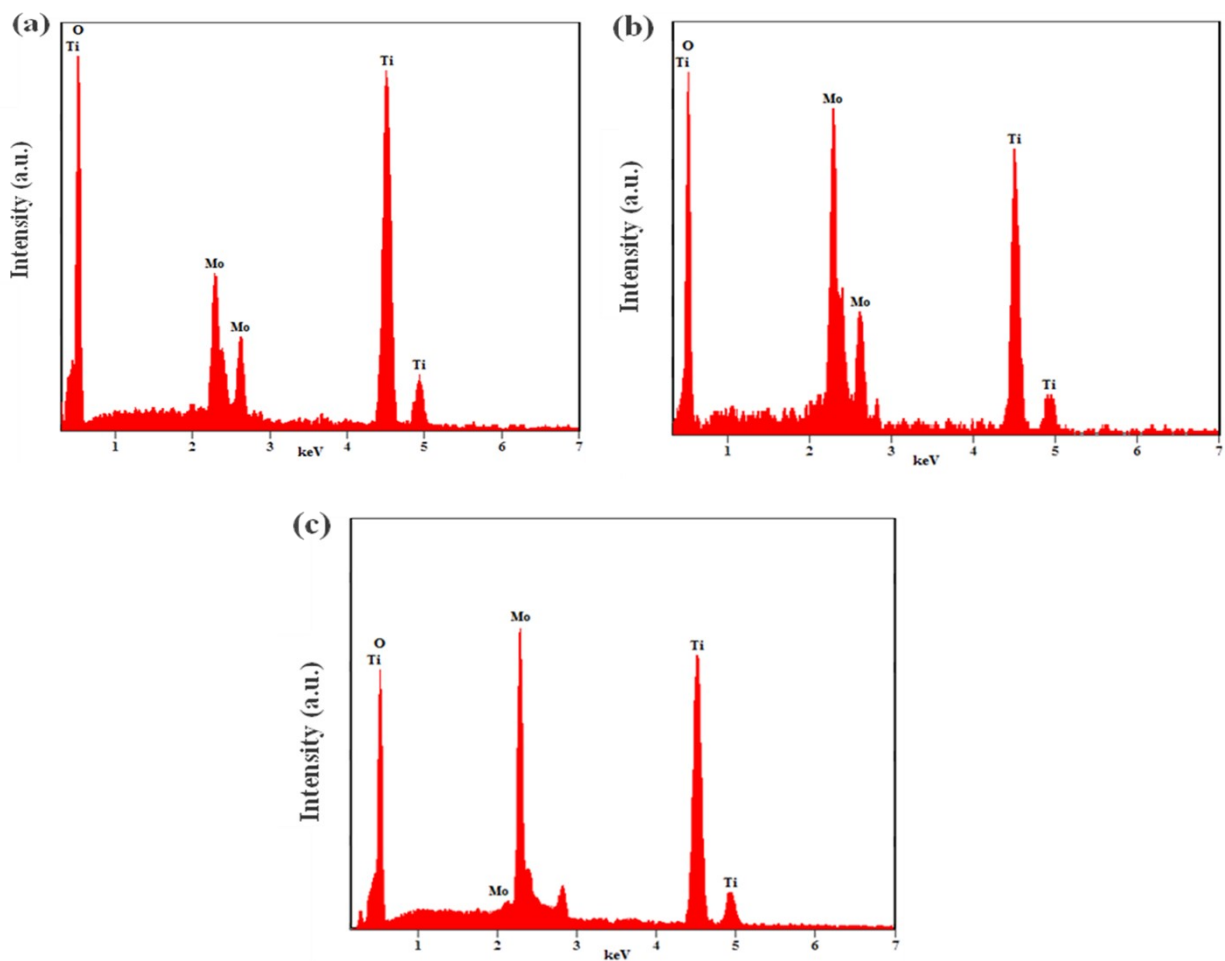

**Fig.S5.** EDX spectra of (a) TO-MO-5, (b) TO-MO-30, and (c) TO-MO-40 heterostructure photocatalyst

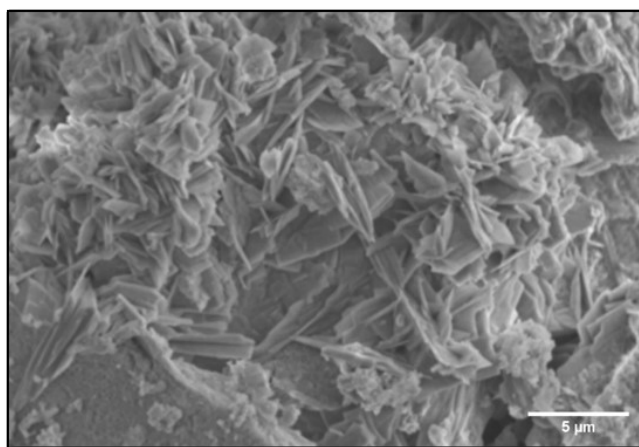

**Fig.S6.** SEM image of TO-MO-30 heterostructure photocatalyst after five cycles

**Table S2.** Photocatalytic water splitting comparison with existing MoO<sub>3</sub> based materials

|    | Catalyst                                                        | Evolved H <sub>2</sub>                     | Evolved O <sub>2</sub> | AQE (H <sub>2</sub> )  | Light source                        | Reff.                |
|----|-----------------------------------------------------------------|--------------------------------------------|------------------------|------------------------|-------------------------------------|----------------------|
| 1  | MoO <sub>3</sub> /Polyamide                                     | ~1000 μmol/h/g                             | ----                   | 2.3%<br>at 420 nm      | Solar light                         | 17                   |
| 2  | Pt/MoO <sub>3</sub> /TiO <sub>2</sub>                           | 169 μmol/h/g                               | -----                  | -----                  | UV light                            | 18                   |
| 3  | 2D/2D MoO <sub>3</sub> -x/g-C <sub>3</sub> N <sub>4</sub>       | 85 μmol/h/g                                | -----                  | 7.8 % at<br>λ > 420 nm | Visible light                       | 19                   |
| 4  | MoO <sub>3</sub> /g-C <sub>3</sub> N <sub>4</sub>               | 512.5 μmol/ h/ g                           | -----                  | -----                  | Visible light                       | 20                   |
| 5  | amine-CdS/MoO <sub>3</sub>                                      | 1029.8 μmol/h/g                            | -----                  | -----                  | Visible light                       | 21                   |
| 6  | Cu <sub>2</sub> S-MoO <sub>3</sub>                              | 21.568 μmol/h/g                            | -----                  | -----                  | 400W<br>Xenon lamp<br>(UV-Vis )     | 22                   |
| 7  | MoO <sub>3</sub> /ZnO                                           | 2.5 ml (Volume)                            | -----                  | -----                  | Visible light                       | 23                   |
| 8  | CdS QD/<br>MoO <sub>3</sub> -OV/g-C <sub>3</sub> N <sub>4</sub> | 294.32 μmol/h/g<br>and<br>1408.57 μmol/h/g | -----                  | 16.35%<br>at 420 nm    | Visible light<br>and<br>Solar light | 24                   |
| 9  | MoO <sub>3</sub> /g-C <sub>3</sub> N <sub>4</sub>               | 20.52 μmol/h/g                             | -----                  | -----                  | Visible light                       | 25                   |
| 10 | HxMoO <sub>3</sub> @ZnIn <sub>2</sub> S <sub>4</sub> (HZ)       | 110 μmol/h/g                               | -----                  | 32.95 %<br>at 420 nm   | Visible light                       | 26                   |
| 11 | TiO <sub>2</sub> -MoO <sub>3</sub>                              | 151 μmol/h/g                               | 76<br>μmol/h/g         | 1.38%<br>at 420 nm     | Simulated<br>solar light            | <b>This<br/>work</b> |

## References

1. Khan AQ, Yuan S, Niu S, Zheng L, Li W, Zeng H. Synthesis of molybdenum oxide-titanium dioxide nanocomposites with ultrashort laser ablation in water. *Optics express*. 2017 Jun 12;25(12):A539-46.
2. Yang H, Li X, Wang A, Wang Y, Chen Y. Photocatalytic degradation of methylene blue by MoO<sub>3</sub> modified TiO<sub>2</sub> under visible light. *Chinese Journal of Catalysis*. 2014 Jan 1;35(1):140-7.
3. Yang M, Zhang L, Jin B, Huang L, Gan Y. Enhanced photoelectrochemical properties and water splitting activity of self-ordered MoO<sub>3</sub>-TiO<sub>2</sub> nanotubes. *Applied Surface Science*. 2016 Feb 28;364:410-5.
4. Song KY, Park MK, Kwon YT, Lee HW, Chung WJ, Lee WI. Preparation of transparent particulate MoO<sub>3</sub>/TiO<sub>2</sub> and WO<sub>3</sub>/TiO<sub>2</sub> films and their photocatalytic properties. *Chemistry of materials*. 2001 Jul 16;13(7):2349-55.
5. Liu H, Lv T, Zhu C, Zhu Z. Direct bandgap narrowing of TiO<sub>2</sub>/MoO<sub>3</sub> heterostructure composites for enhanced solar-driven photocatalytic activity. *Solar Energy Materials and Solar Cells*. 2016 Aug 1;153:1-8.
6. Bai S, Liu H, Sun J, Tian Y, Chen S, Song J, Luo R, Li D, Chen A, Liu CC. Improvement of TiO<sub>2</sub> photocatalytic properties under visible light by WO<sub>3</sub>/TiO<sub>2</sub> and MoO<sub>3</sub>/TiO<sub>2</sub> composites. *Applied Surface Science*. 2015 May 30;338:61-8.
7. Diniz J, Nunes CD, Monteiro OC. Novel approach to synthesise MoO<sub>3</sub>-TiO<sub>2</sub> nanocomposites for the photo-assisted oxidation of benzyl alcohol to benzaldehyde. *Inorganic Chemistry Communications*. 2020 Sep 1;119:108099.

8. Natori H, Kobayashi K, Takahashi M. Fabrication and photocatalytic activity of TiO<sub>2</sub>/MoO<sub>3</sub> particulate films. *Journal of Oleo Science*. 2009;58(4):203-11.
9. Lu M, Shao C, Wang K, Lu N, Zhang X, Zhang P, Zhang M, Li X, Liu Y. p-MoO<sub>3</sub> nanostructures/n-TiO<sub>2</sub> nanofiber heterojunctions: controlled fabrication and enhanced photocatalytic properties. *ACS applied materials & interfaces*. 2014 Jun 25;6(12):9004-12.
10. Kong F, Huang L, Luo L, Chu S, Wang Y, Zou Z. Synthesis and characterization of visible light driven mesoporous nano-photocatalyst MoO<sub>3</sub>/TiO<sub>2</sub>. *Journal of nanoscience and nanotechnology*. 2012 Mar 1;12(3):1931-7.
11. Navgire M, Yelwande A, Tayde D, Arbad B, Lande M. Photodegradation of molasses by a MoO<sub>3</sub>-TiO<sub>2</sub> nanocrystalline composite material. *Chinese Journal of Catalysis*. 2012 Feb 1;33(2-3):261-6.
12. Wang C, Wu L, Wang H, Zuo W, Li Y, Liu J. Fabrication and shell optimization of synergistic TiO<sub>2</sub>-MoO<sub>3</sub> core-shell nanowire array anode for high energy and power density lithium-ion batteries. *Advanced Functional Materials*. 2015 Jun;25(23):3524-33.
13. Lu M, Shao C, Wang K, Lu N, Zhang X, Zhang P, Zhang M, Li X, Liu Y. p-MoO<sub>3</sub> nanostructures/n-TiO<sub>2</sub> nanofiber heterojunctions: controlled fabrication and enhanced photocatalytic properties. *ACS applied materials & interfaces*. 2014 Jun 25;6(12):9004-12.
14. Bai S, Liu H, Sun J, Tian Y, Chen S, Song J, Luo R, Li D, Chen A, Liu CC. Improvement of TiO<sub>2</sub> photocatalytic properties under visible light by WO<sub>3</sub>/TiO<sub>2</sub> and MoO<sub>3</sub>/TiO<sub>2</sub> composites. *Applied Surface Science*. 2015 May 30;338:61-8.
15. Ma BJ, Kim JS, Choi CH, Woo SI. Enhanced hydrogen generation from methanol aqueous solutions over Pt/MoO<sub>3</sub>/TiO<sub>2</sub> under ultraviolet light. *International journal of hydrogen energy*. 2013 Mar 27;38(9):3582-7.
16. Ma BJ, Kim JS, Choi CH, Woo SI. Enhanced hydrogen generation from methanol aqueous solutions over Pt/MoO<sub>3</sub>/TiO<sub>2</sub> under ultraviolet light. *International journal of hydrogen energy*. 2013 Mar 27;38(9):3582-7.
17. Ma C, Zhou J, Cui Z, Wang Y, Zou Z. In situ growth MoO<sub>3</sub> nanoflake on conjugated polymer: An advanced photocatalyst for hydrogen evolution from water solution under solar light. *Solar Energy Materials and Solar Cells*. 2016 Jun 1;150:102-11.
18. Ma BJ, Kim JS, Choi CH, Woo SI. Enhanced hydrogen generation from methanol aqueous solutions over Pt/MoO<sub>3</sub>/TiO<sub>2</sub> under ultraviolet light. *International journal of hydrogen energy*. 2013 Mar 27;38(9):3582-7.
19. Guo Y, Chang B, Wen T, Zhang S, Zeng M, Hu N, Su Y, Yang Z, Yang B. A Z-scheme photocatalyst for enhanced photocatalytic H<sub>2</sub> evolution, constructed by growth of 2D plasmonic MoO<sub>3</sub>-x nanoplates onto 2D g-C<sub>3</sub>N<sub>4</sub> nanosheets. *Journal of colloid and interface science*. 2020 May 1;567:213-23.
20. Shi J, Zheng B, Mao L, Cheng C, Hu Y, Wang H, Li G, Jing D, Liang X. MoO<sub>3</sub>/g-C<sub>3</sub>N<sub>4</sub> Z-scheme (S-scheme) system derived from MoS<sub>2</sub>/melamine dual precursors for enhanced photocatalytic H<sub>2</sub> evolution driven by visible light. *International Journal of Hydrogen Energy*. 2021 Jan 11;46(3):2927-35.
21. Wang S, Zhao X, Sharif HM, Chen Z, Chen Y, Zhou B, Xiao K, Yang B, Duan Q. Amine-CdS for exfoliating and distributing bulk MoO<sub>3</sub> for photocatalytic hydrogen evolution and Cr (VI) reduction. *Chemical Engineering Journal*. 2021 Feb 15;406:126849.
22. Patil SB, Kishore B, Manjunath K, Reddy V, Nagaraju G. One step hydrothermal synthesis of novel Cu<sub>2</sub>S-MoO<sub>3</sub> nanocomposite for lithium ion battery and photocatalytic applications. *International Journal of Hydrogen Energy*. 2018 Feb 22;43(8):4003-14.

23. Bounache K, Boudjemaa A, Boumaza S, Haddad M, Tallas W, Belhadi A, Trari M. Visible Light Hydrogen Evolution over  $\alpha$ -MoO<sub>3</sub> and  $\alpha$ -MoO<sub>3</sub>/ZnO Hetero-Junction. *Open Journal of Physical Chemistry*. 2021 Jun 28;11(3):144-56.
24. Devarayapalli KC, Lee K, Nam ND, Vattikuti SP, Shim J. Microwave synthesized nano-photosensitizer of CdS QD/MoO<sub>3</sub>-OV/g-C<sub>3</sub>N<sub>4</sub> heterojunction catalyst for hydrogen evolution under full-spectrum light. *Ceramics International*. 2020 Dec 15;46(18):28467-80.
25. Li K, Wu W, Jiang Y, Wang Z, Liu X, Li J, Xia D, Xu X, Fan J, Lin K. Highly enhanced H<sub>2</sub> evolution of MoO<sub>3</sub>/g-C<sub>3</sub>N<sub>4</sub> hybrid composites based on a direct Z-scheme photocatalytic system. *Inorganic Chemistry Frontiers*. 2021;8(5):1154-65.
26. Xing F, Cheng C, Zhang J, Liu Q, Chen C, Huang C. Tunable charge transfer efficiency in HxMoO<sub>3</sub>@ ZnIn<sub>2</sub>S<sub>4</sub> hierarchical direct Z-scheme heterojunction toward efficient visible-light-driven hydrogen evolution. *Applied Catalysis B: Environmental*. 2021 May 15;285:119818.
